# Supplementary material
Source: PubMed Central journal article supplement (PMC4813485)
Supplement: 10.1074_M115.683912_jbc.M115.683912-1.pdf [file 10.1074_M115.683912_jbc.M115.683912-1.pdf]

# Supplementary Figure 1

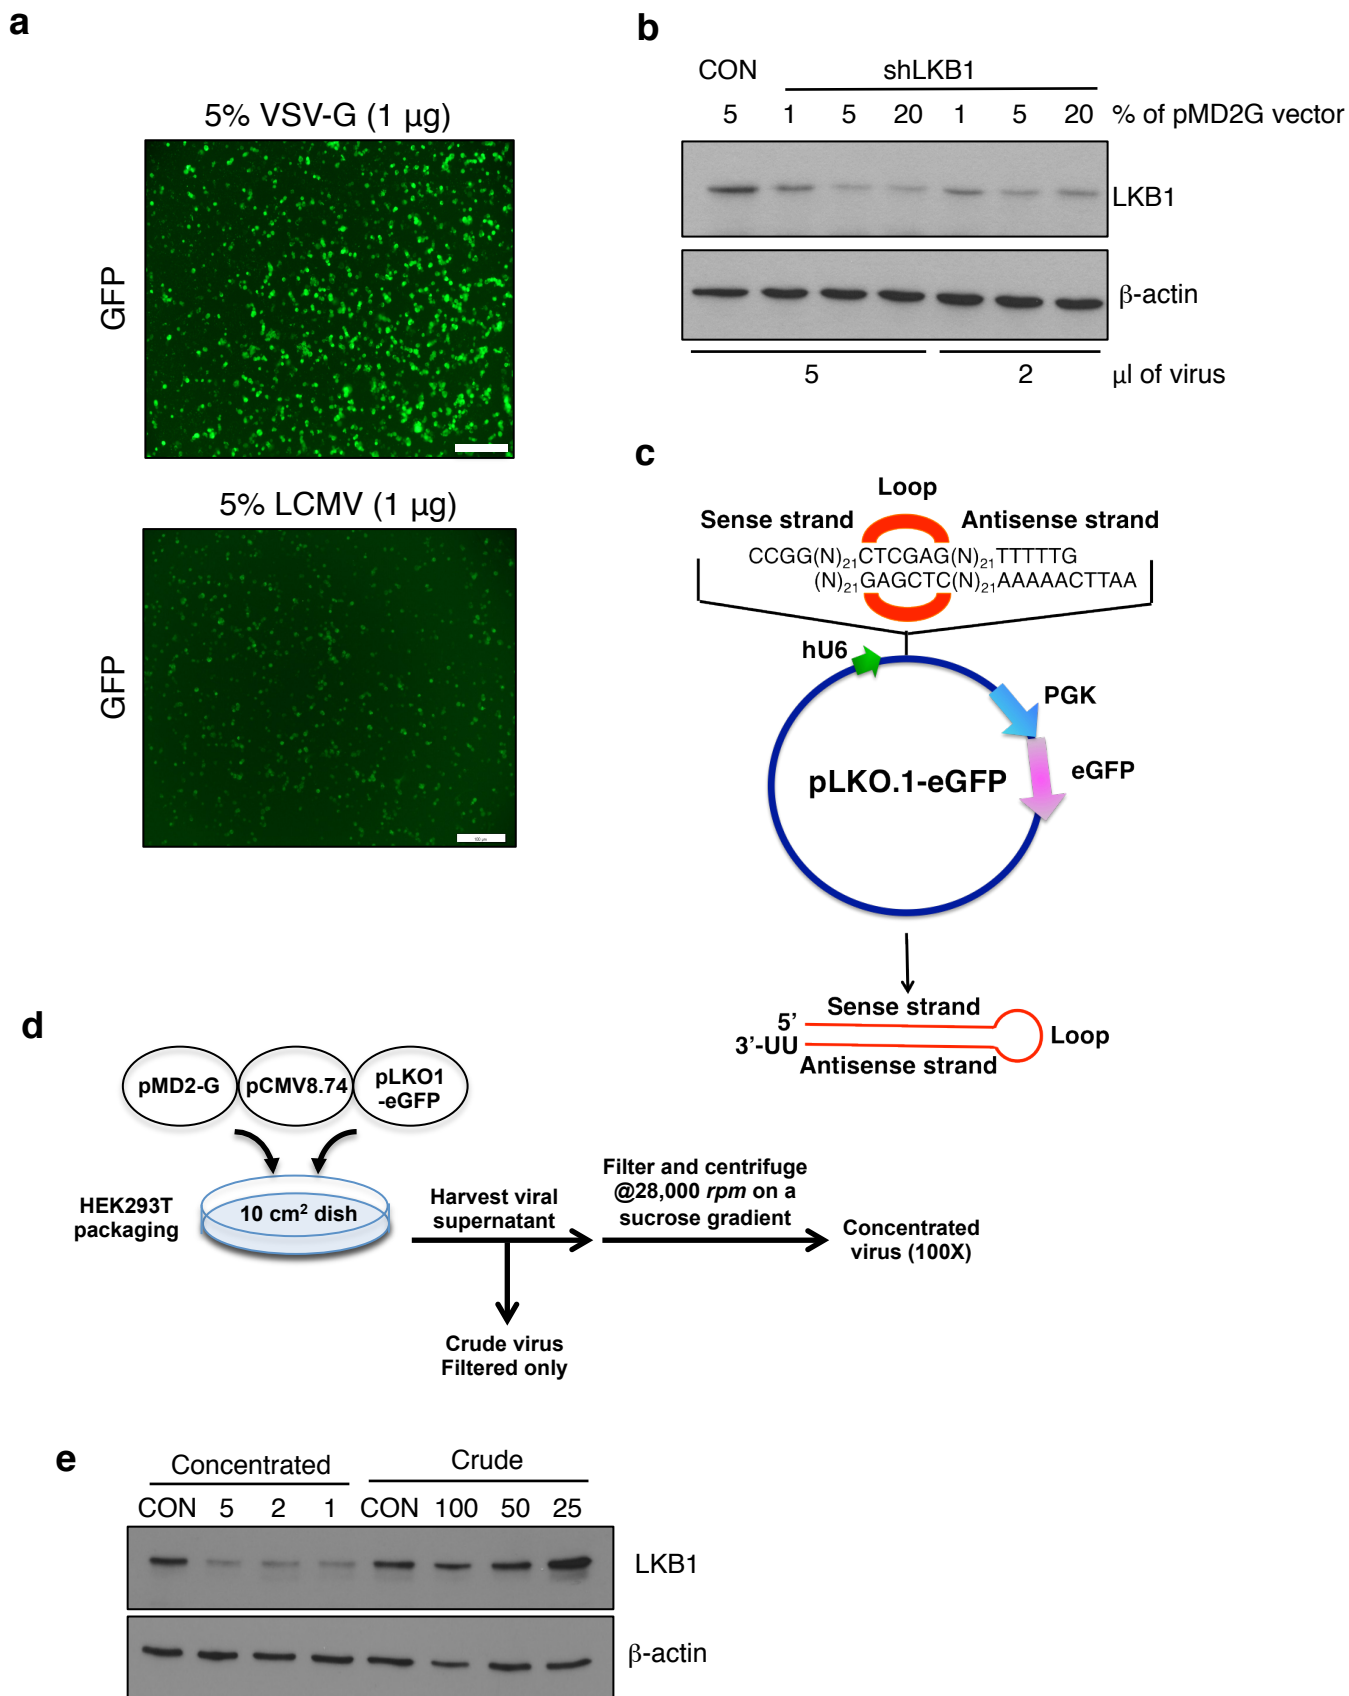

## Supplementary Figure Legend

**Supplementary Figure 1. a.** Fluorescence images with the two different GP coding vectors packaged lentivirus. Scale bar = 100  $\mu\text{m}$ . **b.** Western blot showing the best ratio of pMD2G vector to use, by measuring LKB1 protein level. Beta actin is shown as loading control. Human islets were dispersed, infected with GFP<sup>+</sup> lentiviral encoding for sh-LKB1. **c.** Schematic of the pLKO1-eGFP plasmid used to generate GFP<sup>+</sup> lentivirus encoding shRNA. **d.** Flow chart of lentivirus production and concentration for screen purposes showing distinction between crude and concentrated virus preps. **e.** Representative western blot showing concentrated and crude virus infection efficiency by measuring LKB1 level. Actin is shown as loading and toxicity control.
